# Supplementary material for: Endurance Exercise Training Mitigates Diastolic Dysfunction in Diabetic Mice Independent of Phosphorylation of Ulk1 at S555
Source: MDPI journal article supplement (doi:10.3390/ijms25010633), 2024-01-03
Supplement: s1 [file s1]

# **Endurance Exercise Training Mitigates Diastolic Dysfunction in Diabetic Mice Independent of Phosphorylation of Ulk1 at S555**

Yuntian Guan <sup>1,2,3</sup>, Mei Zhang <sup>1,2,4</sup>, Christie Lacy <sup>1</sup>, Soham Shah <sup>5</sup>, Frederick H. Epstein <sup>5</sup> and  
Zhen Yan <sup>1,2,3,4,5,6,7,\*</sup>

<sup>1</sup>Fralin Biomedical Research Institute, Center for Exercise Medicine Research at Virginia Tech Carilion, Roanoke, VA 24016, USA; yg6ju@virginia.edu (Y.G.)

<sup>2</sup>Center for Skeletal Muscle Research at Robert M. Berne Cardiovascular Research Center, University of Virginia, Charlottesville, VA 22903, USA

<sup>3</sup>Departments of Pharmacology, School of Medicine, University of Virginia, Charlottesville, VA 22903, USA

<sup>4</sup>Departments of Medicine, School of Medicine, University of Virginia, Charlottesville, VA 22903, USA

<sup>5</sup>Departments of Biomedical Engineering, School of Medicine, University of Virginia, Charlottesville, VA 22903, USA; ss8ma@virginia.edu (S.S.); fhe6b@virginia.edu (F.H.E.)

<sup>6</sup>Departments of Molecular Physiology and Biological Physics, School of Medicine, University of Virginia, Charlottesville, VA 22903, USA

<sup>7</sup>Department of Human Nutrition, Foods, and Exercise, College of Agriculture and Life Sciences, Virginia Tech, Blacksburg, VA 24061, USA

**This file contains the supplementary Figure S1-3.**

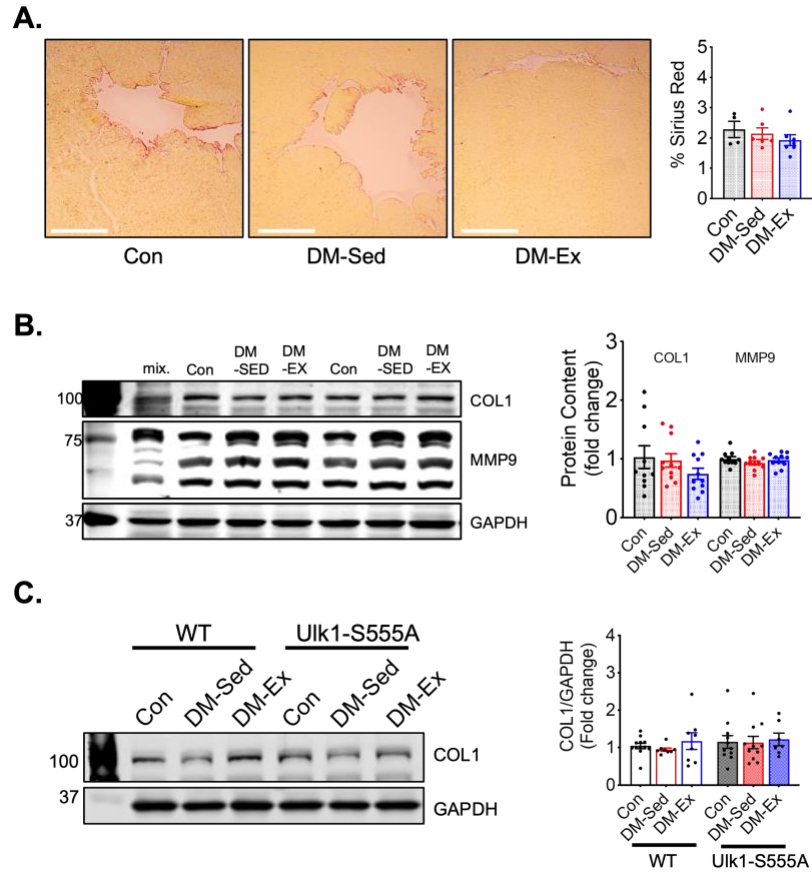

**Fig S1. HFD-STZ-diabetes does not induce significant cardiac fibrosis. (A):** Representative images and quantifications of picro-sirius red staining.  $n = 4, 6, 6$  for Con, DM-Sed and DM-Ex groups, respectively. scale bar =  $500 \mu\text{m}$ . **(B):** Western blot assessment of Col1 and Mmp9 in wildtype whole-heart lysates.  $n = 10 - 12$ . **(C):** Western blot assessment of Col1 in WT and *Uik1-S555A* mice.  $n = 8 - 12$ .

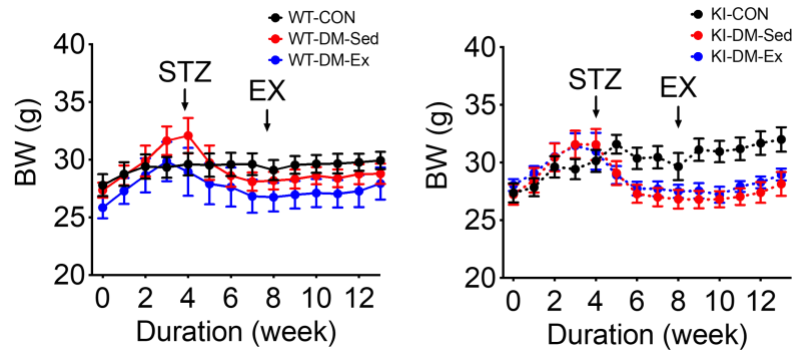

**Fig S2. Body weight of WT and *Ulk1-S555A* mice.** STZ, beginning of injections of STZ; EX, beginning of the 6 weeks of voluntary wheel intervention.

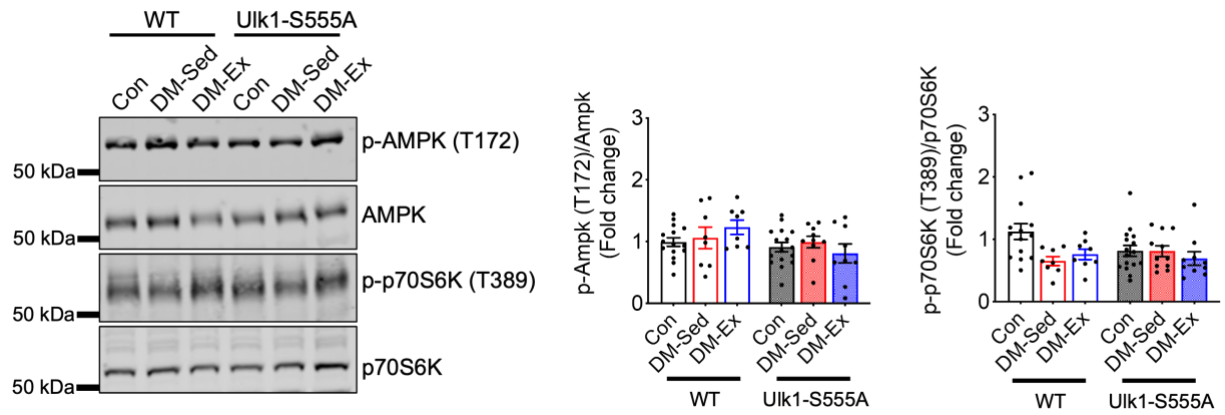

**Fig. S3. AMPK and mTOR signaling in the *Ulk1-S555A* diabetic mice.** Western blot assessment of phosphorylated AMPK (T172) and p70S6K (T389) in WT and *Ulk1-S555A* mice. No significant differences were detected. n = 10 – 16.
